# Supplementary material
Source: publisher figshare collection journal article supplement (https://geolsoc.figshare.com/ndownloader/files/27869692)
Supplement: Supplementary file 1 [file 27869692]

Shafranovsky, I.I. 1964. Nikolay Ivanovich Koksharov. Nauka, Moscow-Leningrad, 216 pp. (In Russian). [Шафрановский И.И. 1964. Николай Иванович Кокшаров. М.Л.: Наука. 1964. 216 с.]

**УЧАСТНИК ЭНСПЕДИЦИЙ Р. МУРЧИСОНА**

Как уже говорилось, Н. В. Чевкин был по-своему прав, настойчиво советуя полюбившемуся ему воспитаннику всерьез заняться только что зародившейся тогда наукой— палеонтологией. Действительно, эта молодая дисциплина внесла много ясности и точности в старую геологию. Поэтому-то юный Кокшаров с огромным интересом следил за «чуть ли не кровопролитным сражением» между двумя его учителями по Горному корпусу — профессором геологии Г. П. Гельмерсеном и профессором палеонтологии Э. И. Эйхвальдом1

Григорий Петрович Гельмерсен (1803—1885), ставший впоследствии первым директором Геологического комитета, славился как крупнейший знаток геологии России. В 1842 г. за составление геологической карты Европейской России ему была присуждена академическая премия. Эдуард Иванович Эйхвальд (1795—1876), медик по образованию и зоолог по специальности, одним из первых занялся палеонтологическими изысканиями в нашей стране. Ему принадлежит и первая крупная сводка по палеонтологии России. В отличие от осторожного в выводах Гельмерсена Эйхвальд часто увлекался и ошибался, но вместе с тем обладал большой самоуверенностью и горячностью в суждениях. Даже в «Энциклопедическом словаре» Брокгауза и Эфрона в посвященной ему статье отмечено, что труд его «не лишен серьезных недостатков, зависящих

1 Воспоминания Н. И. Кокшарова. Русская старина, т. 66, № 4, 1890, стр. 10—11.

55

частью от характера составителя, склонного к увлечению, не любившего признавать допущенных им ошибок».2

Спор между этими двумя учеными разгорелся из—за того, что Гельмерсен, придерживаясь старой методики, определял геологические формации по минералогическим и физическим признакам, без учета палеонтологических данных. На основании наблюдений он отнес серию пластов, залегающих возле Новгорода, к «новому красному песчанику». Эйхвальд, просмотрев окаменелости из этих пластов, сразу же заявил, что Гельмерсен ошибся и что пласты относятся к девонской системе. Гельмерсен, считавший себя первым геологом, воспринял утверждение увлекавшегося Эйхвальда как личное оскорбление. За разрешением спора соперники обратились к крупнейшему авторитету того времени— знаменитому немецкому геологу Леопольду фон Буху (1774—1853), который и объявил о правоте Эйхвальда. «С тех пор, добавляет Кокшаров, — Гельмерсен и Эйхвальд остались до смерти непримиримыми врагами».З

Этот спор, получивший широкую огласку в ученом мире, чрезвычайно заинтересовал выдающегося английского геолога Р.—И. Мурчисона. Желая сопоставить исследованные им осадочные отложения Англии с формациями, описанными Гельмерсеном и Эйхвальдом, Мурчисон обратился к русскому правительству с предложением организовать специальную экспедицию для изучения геологического строения Европейской России. Получив согласие, Мурчисон включил в состав своей экспедиции французского палеонтолога Э. Вернейля и начинающего натуралиста. впоследствии известного зоолога, геолога и путешественника — А. Кайзерлинга. Весной 1840 г. трое ученых приехали в Петербург. Именно в это время Кокшаров, только что сдавший выпускные экзамены в Горном корпусе, был вызван к Н. В. Чевкину. Заботливый начальник объявил новоявленному горному инженеру о том, что он будет сопровождать Мурчисона в его поездке по России.

2 Цит. по: Р. Ф. Геккер. Повесть о палеонтологах прошлого столетия. В кн.: Очерки по истории геологических знаний, вып. 5. Изд. АН СССР, М., 1956, стр. 105. Здесь же содержится очень живо написанная характеристика Э. И. Эйхвальда. См. также: В. Е. Райков. Русские биологи-эволюционисты до Дарвина, т. П. Изд. АН СССР, М.—Л., 1951, стр. 321—389.

3 Воспоминания Н. И. Кокшарова. Русская старина, т. 66, № 4, 1890, стр. 11.

56

При этом Чевкин еще раз подчеркнул важность того научного направления, по которому он пытался направить юного минералога. Кокшаров в своих «Воспоминаниях» приводит слова самого Чевкина. «Вот Вам, мой друг, предстоит хороший случай ознакомиться поближе, каким образом производятся геологические исследования знаменитыми учеными. Будьте внимательны и не упускайте из виду всего того, что может быть полезно для усовершенствования Вас в геологии и палеонтологии. Обращайте особенное внимание на окаменелости, которые теперь играют в геологии важную роль. Затем действуйте к чести русского имени и старайтесь быть приятным именитым иностранцам».4

Легко представить себе те чувства, с которыми Кокшаров прослушал эти наставления. Предстоящее путешествие привлекало и захватывало его. Не могло не интересовать и будущее сотрудничество с выдающимися учеными. Невольно напрашивалась мысль о том, что, быть может, неразумно упорствовать в своем пристрастии к минералогии. Очень уже блестящие перспективы раскрывали перед ним геология и палеонтология. Дальше мы увидим, что Николай Иванович все же не изменил своему влечению и остался «чистокровным минералогом».0днако экспедиция Мурчисона сыграла большую роль в его судьбе. Она расширила кругозор начинающего ученого и сблизила его с выдающимися представителями зарубежной науки.

Имя английского геолога Р.—И. Мурчисона неоднократно будет встречаться нам в дальнейшем тексте этой книги. Поэтому, прежде чем описывать знаменитую экспедицию и участие в ней Н. И. Кокшарова, необходимо сказать несколько слов об этом ученом. Родерик Импи Мурчисон (1792—1871) получил военное образование и в течение ряда лет служил в армии. В 30-летнем возрасте он увлекся естественными науками, в особенности геологией. Этому способствовало и его знакомство с известными английскими геологами Ч. Лайелем и А. Седжвиком, с которыми он совершил ряд экскурсий. Вскоре Мурчисон обратил на себя внимание исследованиями по стратиграфии палеозойских отложений. Высокую оценку в истории геологии получили его монографии о силурийской системе и геологическом строении России. На родине Мурчисон

4 Там же, стр. 12,

57

занимал должность начальника Геологической службы и директора Геологического музея в Лондоне.

В 1845 г., после его поездки по России, Петербургская академия наук избрала английского геолога своим действительным членом. Следует особо отметить неизменную симпатию Мурчисона к нашей стране, которую он горячо полюбил во время двух своих русских экспедиций. Во время Крымской войны Мурчисон активно выступал против участия Англии в военной кампании 1854—1855 гг. Приведем отрывок из выступления Н. И. Кокшарова на заседании Петербургского минералогического общества через три дня после кончины английского ученого: «В Лондоне скончался 11—го октября сего 1871 г., на восьмидесятом году от рождения, один из знаменитейших геологов нашего времени, сер Родерик Мурчисон. Императорское Минералогическое общество приняло это известие c великою скорбью. И кто, конечно, мог глубже чувствовать и достойнее оценить утрату, понесенную наукою через новую могилу, как не наше общество, в котором геология является обильным элементом.

«Было бы излишне исчислять перед вами в подробности геологические творения Мурчисона; многие из них сделались классическими, каково например ‚‚Силурийская система“, и вообще все они вам хорошо известны. Поэтому я позволю себе напомнить вам о том благотворном влиянии, которое произвел Мурчисон на наших геологов двукратным своим путешествием по России, и о той незабвенной услуге, которую оказал он нам, определив с точностью относительную древность геологических формаций Европейской России и обозначив границы их на карте обширного отечества нашего. Нельзя не удивляться, каким образом мог он достигнуть столь грандиозных результатов в такое короткое время! Только глубокие познания, опытность, энергия и любовь к науке Мурчисона, помощь ученых его спутников — гг. де Вернейля и графа Кайзерлинга могли привести задуманное предприятие к столь блистательному окончанию. Обширное сочинение „Россия и Уральские горы“ и „Геологическая карта ЕвропейскойРоссии и хребта Уральского“ составляют драгоценное наследство, оставленное Мурчисоном нашему отечеству.

«Заслуги Мудрчисона перед Россией в ученом отношении, конечно, весьма велики, по и в отношении полити—

58

ческом он успел оказать ей также немалые услуги. Мурчисон остался верным другом России до последней минуты своей жизни. Он постоянно сохранял чувства искренней приязни и благодарности к стране, в которой он встретил полное радушие и гостеприимство. Мурчисон доказал эти столь дорогие для русского сердца чувства в особенности в эпоху Севастопольской кампании, когда ему пришлось перенести много неприятностей за слишком открытое сочувствие к нашему отечеству.

«И на словах, и в печати, несмотря на все возгласы раздраженной нации, находившейся в борьбе с Россиею, Мурчисон не переставал защищать Россию от взводимых английскою прессою несправедливых обвинений. Те из русских, которым довелось посетить Англию и познакомиться с Мурчисоном, засвидетельствуют, с каким радушием обходился он с нашими земляками и в каких выражениях отзывался он о приеме, сделанном ему русскими в России. Мне, как спутнику Мурчисона в его путешествии по России и как человеку, остававшемуся с ним в самых дружественных отношениях до самой его смерти, чувства его к нашей стране известны, может быть, лучше, нежели другим. Горячая признательность к лицам, оказавшим ему радушие или какие—либо услуги, никогда не изглаживалась из его благородного сердца и служила отличительною чертою его честного характера».5

Нельзя не привести интересного описания наружности Мурчисона, которое дал Кокшаров в своих «Воспоминаниях»: «Р. Мурчисон, один из богатейших английских ученых, представлял собой тип англичанина высшего общества; он был предупредителен, учтив и крайне деликатен в обращении, чем «отличаются немногие из его земляков-путешественников. Он был высокого роста, не толст и не сухощав, с открытым, доброжелательным лицом, на котором отражалась некоторая гордость или, вернее сказать, сознание собственного достоинства. Всегда одетый во время путешествия с особенной огпрятностью (хотя часто должен был действовать молотком, разбивая камни), он неизменно носил на шее лорнет с привешенной к нему лупой и серебряным карандашом, которым записывал

5 Цит.: М. И. Радовский. Из переписки Р. Мурчисона с петербургскими академиками. Вопросы истории естествознания и техники, вып. 1, 1956, стр. 259,

59

в свою записную книжку все виденное им и слышанное».6

Как увидим из дальнейшего, Мурчисон дружески отнесся к молодому Кокшарову, высоко оценив его способности и любовь к науке. Нравился ему и открытый жизнерадостный характер юного горного инженера. В разговорах и письмах он нередко называл его «мой милый Кок».

Сблизился Н. И. Кокшаров и со спутником Мурчисона—известным французским палеонтологом Э. Вернейлем. Это имя не раз еще встретится на страницах биографии русского минералога. Поэтому нельзя не привести здесь и характеристики Вернейля из тех же «Воспоминаний», тем более что в ней в живой и остроумной форме дается мастерское сопоставление обоих знаменитых спутников Кокшарова: «Если Мурчисон был несколько важен и имел манеры придворного человека, то Эдуард Вернейль представлял в этом отношении полную противоположность и был крайне прост в обращении. Это был честнейший, добродушнейший человек, настолько натуральный в своих душевных проявлениях, что название „дитя природы“, данное ему одним из моих приятелей, вполне подходило к Вернейлю. Он был всецело предан науке и в то же время страстно любил музыку, поэзию и вообще все, что касалось эстетики. Как часто во время наших геологических экскурсий, сидя на перекладной телеге, мы распе

вали «с ним арии и дуэты из ‚‚Нормы“, „Семирамиды“, „Вильгельма Телля“, „Роберта“ и др. Э. Вернейль был среднего роста, имел приятное выразительное лицо, но был настолько близорук, что не мог сделать шагу без лорнетки».7

Какие же обязанности должен был исполнять юный Кокшаров, участвуя в экспедиции Мурчисона? Ответ на этот вопрос находится в приводимом ниже документе — предписании, присланном Штабом Корпуса горных инженеров от 25 мая 1840 г. «Корпуса горных инженеров г. подпоручику Кокшарову» о командировании его «для сопутствования геологов Мурчисона и Вернейля в геологической поездке их по Рос-сии»: «Г. главноуправляющий

6 Воспоминания Н. И. Кокшарова. Русская старина, т. 66, № 4, 1890, стр. 13. Приводимая характеристика относится ко времени первого приезда английского геолога в Россию.

7 Там же, стр. 15.

60

корпусом горных инженеров приказать изволил: вместе с геологами Мурчисоном и Вернейлем, имеющим объехать с г. действительным статским советником бароном Мейендорфом, в отношении геогностическом, некоторые из Великороссийских губерний, командировать Ваше благородие как для составления при этом надлежащих о тех странах геологических и палеонтологических коллекций, кои у нас еще весьма не полны, так и для того, чтобы воспользоваться этим удобным случаем для практического ознакомления Вас, под руководством известнейших геологов, с геогностическими изысканиями, в особенности с формациями каменноугольными, столь хорошо изученными г. Мурчисоном; для пособия же при составлении помянутых коллекций отправить с Вами одного из нижних чинов горных.

«О таковом приказании г. главноуправляющего корпусом давая знать Вашему благородию, предлагаю Вам:

«1. По получении сего предписания явиться к г. действительному статскому советнику барону Мейендорфу и, осведомившись от его превосходительства о времени отъезда его с гг. Мурчисоном и Вернейлем, отправиться Вам вместе с бароном Мейендорфом для сопутствия помянутым ученым в геогностической поездке их по Великороссийским губерниям; по окончании же сей поездки Вы возвратитесь сюда вместе с гг. Мурчисоном и Вернейлем для представления надлежащего отчета в занятиях Ваших и затем для получения дальнейшего назначения по службе.

«2. В продолжение таковой поездки Вашей, кроме изучения страны в геогностическом отношении и возможного с Вашей стороны содействия к удобнейшему путешествию гг. Мурчисона и Вернейля, постановляется Вам главнейше в обязанность собирать для Горного института со всею тщательностью образцы горнокаменных пород и особенно окаменелостей тех стран, кои Вы будете осматривать, с тем чтобы по мере собирания штуфов и окаменелостей высылать их при первом удобном, но верном случае, при рапортах, в корпусный штаб в надежной укупорке и с надлежащими реестрами, в коих подробно означить месторождение штуфов.

«3. Для пособия при составлении минеральных коллекций имеете Вы взять с собой ожидаемого сюда на днях с Колывано-Воскресенских заводов кандидата Денисова,

61

Коему по прибытии приказано будет явиться к Вашему благородию.

«4. Во все время пребывания Вашего в настоящей командировке доносить корпусному штабу об успехе занятий Ваших по возможности через каждые две недели, а в нужных случаях неотлагательно. Вместе с тем уведомляю я Ваше благородие, что перед отъездом Вашим Вы получите от корпусного штаба денежную сумму четыреста пятьдесят рублей серебром».8

Несмотря на сухой, канцелярский язык того времени, мы все же улавливаем в этом предписании основную мысль Чевкина — еще и еще раз напоминает он о важности изучения палеонтологии. Не забывает Чевкин позаботиться и о своем любимом музее при Горном институте и стремится использовать поездку Кокшарова для пополнения его палеонтологических и минералогических коллекций. На основании этого документа можно заключить, что Кокшаров сопровождал Мурчисона в качестве коллектора.

Путешествие продолжалось около двух с половиной месяцев и оказалось весьма удачным, чему способствовала и хорошая погода, стоявшая в то время. «За этот срок, — писал Кокшаров, — мы обследовали окрестности Петербурга, берега реки Волхова, Валдайские горы, окрестности озера Ильмень, Вологодскую и Архангельскую губернии, вплоть до Пинеги. На возвратном пути мы посетили Ярославль, Кострому, Нижний Новгород, Муром, Елатьму, Касимов, Рязань и Коломну».9

Для начинающего ученого, по его собственному признанию, эта поездка оказалась весьма полезной. С живым любопытством следил «он ‚за методикой и способами наблюдений знаменитых геологов. Высоко расценивались им впоследствии и результаты экспедиции: «До этого, отмечал он, мы знали весьма мало о России в в геогностическом отношении и еще менее об ее Европейской части».10

Вернувшись в Петербург, юный участник экспедиции сразу же получил строгий-приказ Чевкина представить подробный рапорт о своем путешествии. Узнав, что Кок-

8 Там же, стр. 268—270 (приложение 1). Под текстом приведенного документа стоят две подписи—начальника штаба генерал—майора Чевкина и подполковника Самарского—Быховца.

9 Там же, стр. 13.

10 Там же, стр. 15.

62

шаров старался по возможности усвоить приемы и способы исследования иностранных геологов, а кроме того, внимательно следил за составлением ими геологической карты, Чевкин велел отразить все это в рапорте, добавив к нему и саму геологическую карту.

Написанный Кокшаровым отчет вместе с составленной им схематизированной геологической картой северной половины Европейской России был в том же 1840 г. напечатан в «Горном журнале» под заголовком «Геогностические замечания о некоторых губерниях Европейской России». Эта чисто геологическая статья была его первой печатной работой.

В своей статье Кокшаров строго следовал определениям Мурчисона. Однако при описании древнего красного песчаника дебютант высказал сомнения относительно заключений знаменитого геолога. Приведем цитату из упомянутой статьи, свидетельствующую о самостоятельности и известной смелости начинающего автора: «Система древнего красного песчаника, образуя осадки огромной толщины, является в большом развитии по губерниям Олонецкой, Архангельской, Новгородской, Псковской и Лифляндской, а может быть, и по Вологодской, Костромской, Ярославской, Нижнегородской и Владимирской. Я говорю „может быть“ потому, что вопрос о почве, распространенной в этих последних губерниях, нам, русским, кажется, еще не должно считать совершенно решенным. Есть ли это система древнего красного песчаника, в чем Мурчисон почти не сомневался, или другая новейшая формация (покоющаяся на горном известняке), сказать с достоверностью нельзя до тех пор, пока какое—нибудь обнажение не укажет соприкосновение горного известняка с этой системой или пока не найдутся в ней органические остатки, которых до сих пор не отыскалось».11

Сдав Чевкину требуемый отчет, Кокшаров, по его словам, «опять попал в общую колею» и получил назначение в Екатеринбург (ныне Свердловск), где стал горным инженером при монетном дворе. В Екатеринбурге же работал и жил с семьей его отец.

Зимой того же 1840 г. на имя Кокшарова в Екатеринбург пришло письмо из Лондона от самого Мурчисона.

11. Н. И. Кокшаров. Геогностические замечания о некоторых губерниях Европейской России. Горный журнал, 1840, ч. IV, стр. 148.

63

С удовольствием и гордостью прочитал он в нем следующие строки: «Любезный Кокшаров! Пересмотрев и обсудив мои путевые заметки, я нашел, что Вы были правы, что огромная толща глины и рухляков лежит действительно не под горным известняком, а над ним и потому принадлежит формации более поздней, нежели горный известняк».12

Для начинающего исследователя такое признание опытнейшего геолога было, конечно, чрезвычайно приятным и ценным. Кокшаров сразу же послал ответное письмо, и с тех пор дружеская переписка между ними не прекращалась до самой смерти Мурчисона.

И все таки, несмотря на явный успех его самой первой геологической работы, Николай Иванович не изменил своему призванию. В Екатеринбурге с возросшей силой воскресла его давняя страсть к минералогии. Поселившись в отцовском домике, он прежде всего позаботился об удобном размещении своей минералогической коллекции. Родители, хорошо зная вкусы сына, порадовали его подарками: отец преподнес несколько прекрасных кристаллов уральских минералов, а мать отыскала где-то корзину с упакованными в ней очень хорошими минералогическими образцами. «Я не был особенно обременен службой и мог на свободе заняться минералогией и пополнением моей коллекции, вспоминал впоследствии ученый. Наша старая лошадь Серко была еще жива, и так как ее предоставили в мое ‚распоряжение, то я разъезжал почти каждое утро, отыскивая минералы у разных екатеринбургских купцов. Несмотря на зимнее время, я съездил в деревню Мурзинку, отстоящую от Екатеринбурга на 80 верст, но, кроме одного кристалла берилла, купленного у тамошнего священника, я ничего другого добыть не мог».13

Спокойно и размеренно протекала жизнь минералога в екатеринбургском затишье. С утра он шел на службу, затем обедал, а потом занимался минералами, «между которыми оказалось очень много редких и роскошных экземпляров».14 Однако однообразие такого существова—

12 Воспоминания Н. И. Кокшарова. Русская старина, т. 66, № 4, 1890, стр. 17. Позднейшими работами была доказана принадлежность упомянутых отложений к пермской системе, и тем самым подтвердилась точка зрения Н. И. Кокшарова.

13 Там же, стр. 18.

14 Там же.

64

ния вскоре начало тяготить молодого человека. Наступила снежная уральская зима 1840/41 г. С тоской стали припоминаться блестящие петербургские театры, любимые оперы и балеты, знаменитые артисты и артистки. Даже в старости, рассказывая о переживаниях того времени, Кокшаров заполняет в «Воспоминаниях» целые страницы перечнем имен популярных деятелей сцены с пространными их оценками и характеристиками. К счастью, тоскливое времяпрепровождение продолжалось недолго: уже в феврале 1841 г. он узнал о предстоящей летней командировке. Цель новой командировки была та же, что и у предыдущей, — «сопровождение иностранных ученых Мурчисона и Вернейля в их вторичном путешествии по России».15 «Мы обследовали в геологическом отношении, — пишет Кокшаров о новой экспедиции, — всю местность от Петербурга до Перми; отсюда отправились в Екатеринбург и по всему Уралу — от Богословского завода до самых южных частей хребта».16

Поездка по Уралу помогла обратить особое внимание на минералогические богатства этого края. Припоминая знаменитое путешествие А. Гумбольдта и Г. Розе, в результате которого в 1829 г. были обнаружены первые уральские алмазы, Кокшаров пытался и сам отыскать драгоценные кристаллы этого редчайшего минерала. Однако попытка оказалась безуспешной, что и дало ему повод сомневаться в подлинности уральских алмазов. На страницах «Воспоминаний» Николай Иванович откровенно признается в своих сомнениях. Весьма характерна в этом отношении и следующая его фраза, записанная профессором Р. А. Пренделем: «Не верю я, чтобы те мелкие алмазы, которые выдают за уральские, были бы действительно с Урала. Не такова мощь русской природы: у нас что ни драгоценный камень — то гигант».17 Только замечательные результаты поисков советских геологов смогли бы разубедить минералога в его ошибочном заключении.

Заканчивая осмотр Северного Урала, Мурчисон решил посетить титано—магнетитовое месторождение на горе Качканар, еще не разрабатывавшееся в то время. Путь

15 Там же.

16 Там же.

17 Р. Прендель. Памяти Н. И. Кокшарова. Одесса, 1893, стр. 71.

65

к этой горе был нелегким: приходилось пробираться сквозь густые заросли. Зато чудный вид, открывшийся с вершины горы, и знакомство с замечательным месторождением вполне вознаградили путников за проделанную ими трудную дорогу. Южный Урал был изучен экспедицией так же подробно, как и Северный.

Для полноты картины приведем рассказ Николая Ивановича об одном происшествии, написанный в духе старых приключенческих романов: «Везде иностранные путешественники встречали самый радушный прием и содействие как со стороны горных инженеров, так и местных жителей. Все шло благополучно, и только ночью, на обратном пути из Илецкой защиты в Оренбург, с нами случилось небольшое приключение, не имевшее, однако, дурных последствий. Мы ехали в большом полузакрытом тарантасе наподобие коляски; я сидел впереди, а против меня —Мурчисон и Вернейль, как вдруг наш ямщик и форейтор (башкиры) начали кричать и погнали что есть силы лошадей, так что меня всего засыпали песком. Причина этого скоро объяснилась: мы увидели, что за нами гонятся в одноколке два человека; они что—то кричали нашему ямщику на непонятном для нас языке. При этом произошла комическая сцена: Мурчисон, не имея при себе никакого оружия, схватил опорожненную нами бутылку шампанского и выставил горлышко из тарантаса в виде пистолета, полагая испугать этим гнавшихся за нами разбойников. Но это оказалось лишним, потому что они сами стали мало—помалу отставать от нас и, наконец, совсем скрылись из виду.

«По приезде в Оренбург я спросил ямщика относительно нашего дорожного приключения. „Ничего, бачка, шалят“, — ответил он».18

Не лишено интереса также повествование Кокшарова о том, с какой роскошью обставил прием путешественников оренбургский генерал—губернатор В. А. Перовский, проводивший лето в окрестностях Оренбурга. Страсбургские пироги, консервы и дорогие вина украшали обеденный стол. Во время трапезы играл башкирский оркестр на особых духовых инструментах. В качестве развлечения была устроена охота на птиц, во время которой Перов—

18 Воспоминания Н. И. Кокшарова. Русская старина, т. 66, № 4, 1890, стр. 23.

66

ский по оплошности отстрелил себе палец и чуть не убил Кокшарова.

Посетив Урал, экспедиция отправилась в Екатеринославль и другие области южной России. Кокшаров же, по просьбе самого Мурчисона, вернулся в окрестности Оренбурга, для того чтобы проверить некоторые геологические детали, вызвавшие сомнение у английского геолога. Отлучка молодого ученого, предпринятая без разрешения свыше, страшно прогневала Чевкина. Грозный начальник велел даже отменить приказ о награждении Кокшарова орденом за двухлетнее участие в знаменитой экспедиции. Зато Мурчисон высоко оценил сотрудничество молодого минералога. Издав в 1845 г. геологическую карту России, он счел необходимым в подписи к ней поставить и имя русского ученого: «На месте наблюдений принимал участие лейтенант Кокшаров». Следует отметить, что издание этой карты явилось крупным событием в истории геологии России. Несмотря на свою схематичность, она позволила впервые связать геологию нашей страны с геологическим строением Европы. И не следует забывать, что при выполнении этой исторической задачи принимал активное участие и Н. И. Кокшаров.

Перед отъездом в Англию Мурчисон возбудил перед русским правительством ходатайство о командировке молодого минералога за границу для осмотра геологических и минералогических музеев и посещения лекций крупнейших европейских ученых. Сменив гнев на милость, Чевкин поддержал это ходатайство, и Н. И. Кокшаров был отправлен в первую заграничную командировку.
